# Supplementary material for: The Inclusion of the Microalga Scenedesmus sp. in Diets for Rainbow Trout, Onchorhynchus mykiss, Juveniles
Source: MDPI journal article supplement (doi:10.3390/ani10091656), 2020-09-15
Supplement: s1 [file s1]

## The Inclusion of the Microalga *Scenedesmus* sp. in Diets for Rainbow Trout, *Onchorhynchus mykiss*, Juveniles

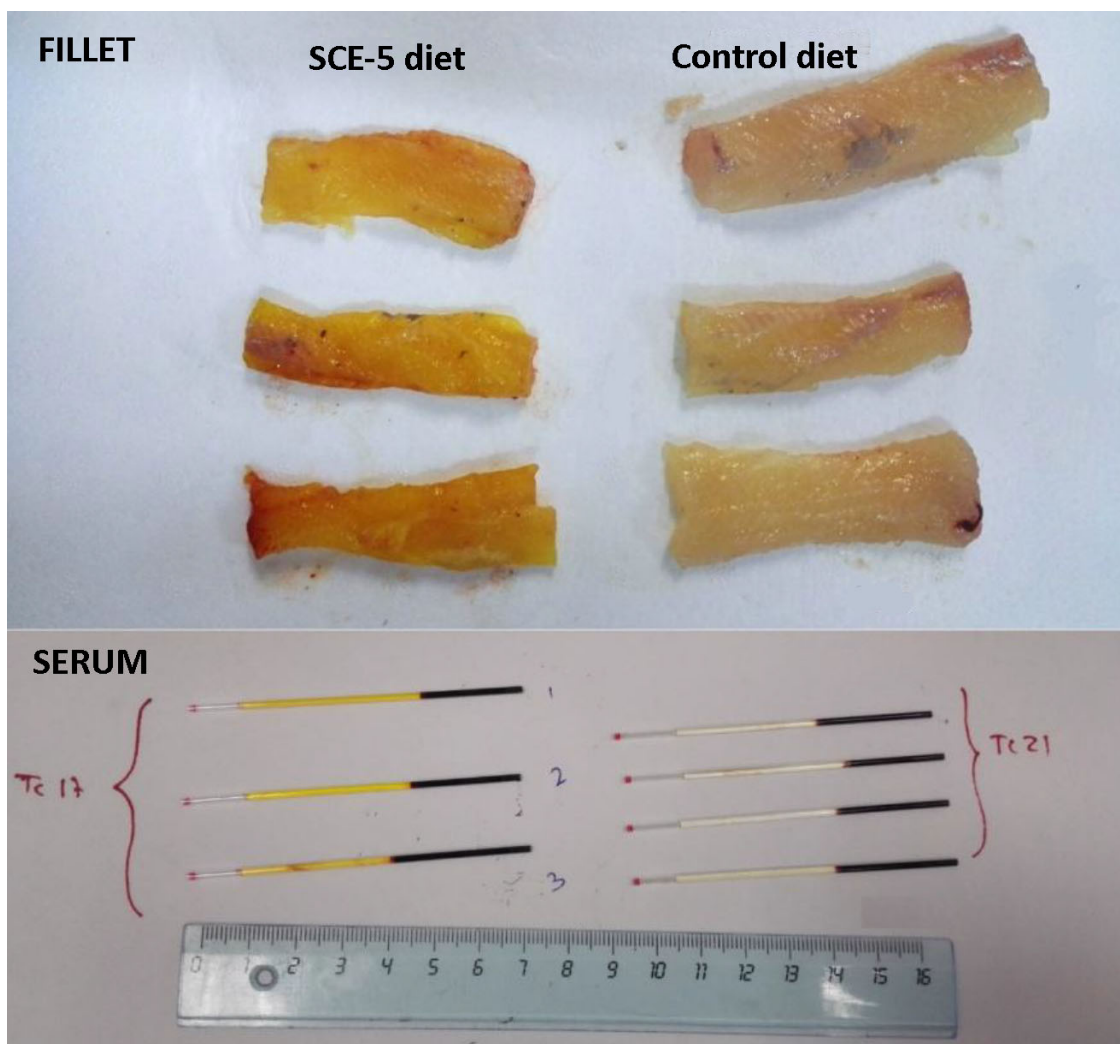

**Figure S1.** Examples of fillet and serum color from *Oncorhynchus mykiss* juveniles fed diets containing 5% of *Scenedesmus* sp. for 45 days.

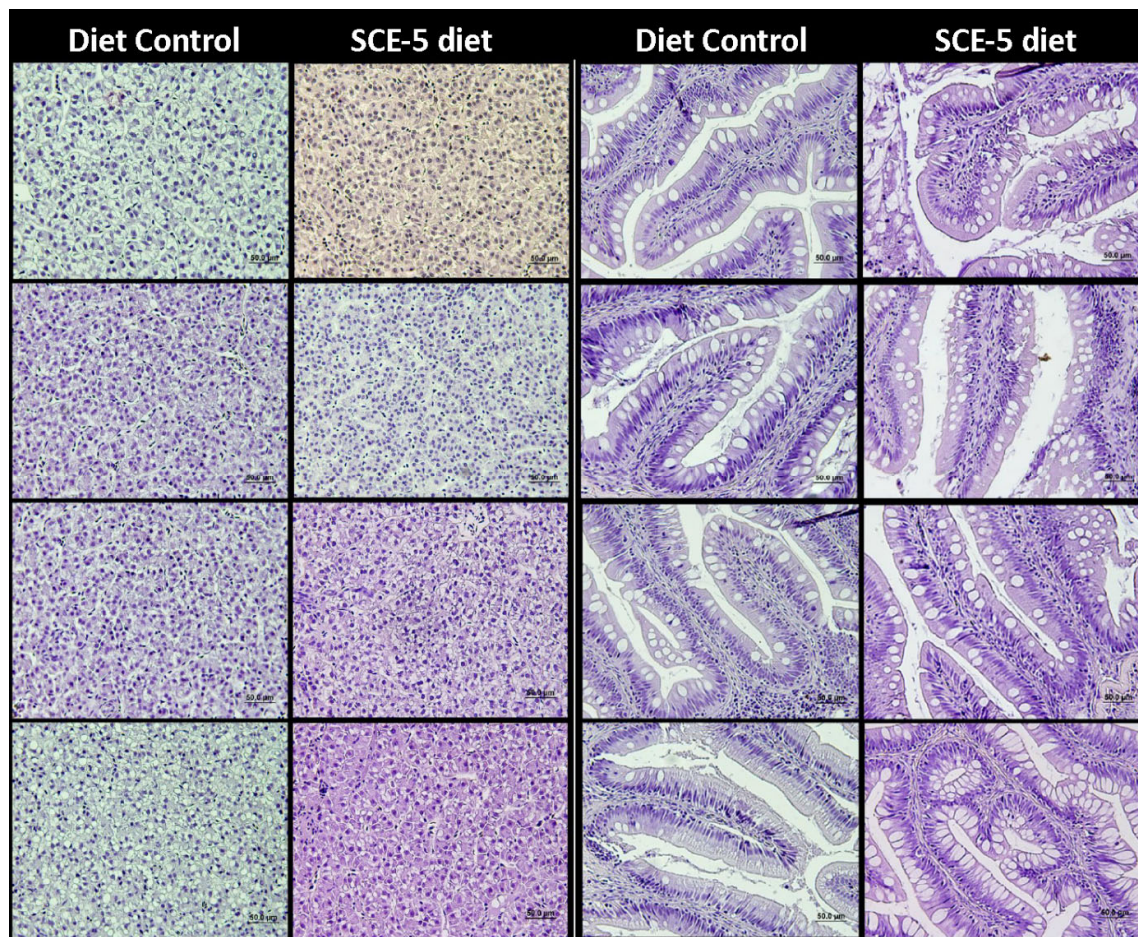

**Figure S2.** Histological organization of the liver (hepatic parenchyma) and anterior-mid intestine of *Oncorhynchus mykiss* juveniles fed diets containing 5% of *Scenedesmus* sp. for 45 days. Three images from different specimens are shown per dietary group in order to show individual variation. Staining: hematoxylin-eosin.
